# Supplementary material for: Enhanced proton and electron reservoir abilities of polyoxometalate grafted on graphene for high-performance hydrogen evolution
Source: Royal Society of Chemistry journal article supplement (doi:10.1039/c5ee03503a), 2015-12-18
Supplement: c5ee03503a1.pdf [file c5ee03503a1.pdf]

## Supporting Information

### Enhanced proton and electron reservoir abilities of polyoxometalate grafted on graphene for high-performance hydrogen evolution

Rongji Liu,<sup>a</sup> Guangjin Zhang,<sup>\*a</sup> Hongbin Cao,<sup>a</sup> Suojian Zhang,<sup>a</sup> Yongbin Xie,<sup>a</sup> Ali Haider,<sup>b</sup> Ulrich Kortz,<sup>\*b</sup> Banghao Chen,<sup>c</sup> Naresh S. Dalal,<sup>\*c</sup> Yongsheng Zhao,<sup>d</sup> Linjie Zhi,<sup>e</sup> Cai-Xia Wu,<sup>f</sup> Li-Kai Yan,<sup>\*f</sup> Zhongmin Su<sup>f</sup> and Bineta Keita<sup>g</sup>

<sup>a</sup>Key Laboratory of Green Process and Engineering, Institute of Process Engineering, Chinese Academy of Sciences, 100190, Beijing, China

E-mail: [zhanggj@ipe.ac.cn](mailto:zhanggj@ipe.ac.cn)

<sup>b</sup>Jacobs University, Department of Life Sciences and Chemistry, P.O. Box 750 561, 28725 Bremen, Germany

E-mail: [u.kortz@jacobs-university.de](mailto:u.kortz@jacobs-university.de)

<sup>c</sup>Florida State University, Department of Chemistry and Biochemistry, Tallahassee, FL 32306-4390, USA

E-mail: [dalal@chem.fsu.edu](mailto:dalal@chem.fsu.edu)

<sup>d</sup>Beijing National Laboratory for Molecular Sciences (BNLMS), Key Laboratory of Photochemistry, Institute of Chemistry, Chinese Academy of Sciences, 100190, Beijing, China

<sup>e</sup>Key Laboratory of Nanosystem and Hierarchical Fabrication, National Center for Nanoscience and Technology, 100190, Beijing, China

<sup>f</sup>Faculty of Chemistry, Northeast Normal University, 130024, Changchun, China

E-mail: [yanlk924@nenu.edu.cn](mailto:yanlk924@nenu.edu.cn)

<sup>g</sup>Retired from Université Paris-Sud, Laboratoire de Chimie-Physique, UMR 8000 CNRS, Orsay, F-91405, France.

| <b><i>Table of contents</i></b>                                | <b><i>Page</i></b> |
|----------------------------------------------------------------|--------------------|
| Figure S1                                                      | 3                  |
| SI-1: X-ray photoelectron spectroscopy (XPS) analysis          | 3                  |
| Figure S2                                                      | 4                  |
| Table S1                                                       | 5                  |
| Table S2                                                       | 5                  |
| SI-2: Raman spectroscopy analysis                              | 5                  |
| Figure S3                                                      | 6                  |
| SI-3: Fourier transform infrared spectroscopy (FT-IR) analysis | 6                  |
| Figure S4                                                      | 7                  |
| Figure S5                                                      | 8                  |
| Figure S6                                                      | 9                  |
| Figure S7                                                      | 9                  |
| Figure S8                                                      | 10                 |
| Figure S9                                                      | 10                 |
| Figure S10                                                     | 11                 |
| SI-4: Pt deposition                                            | 11                 |
| Figure S11                                                     | 12                 |
| Figure S12                                                     | 13                 |
| Table S3                                                       | 13                 |
| Figure S13                                                     | 16                 |
| Figure S14                                                     | 17                 |
| Figure S15                                                     | 17                 |
| Figure S16                                                     | 18                 |
| Figure S17                                                     | 19                 |
| SI-5: Description of Movie S1                                  | 19                 |
| References                                                     | 19                 |

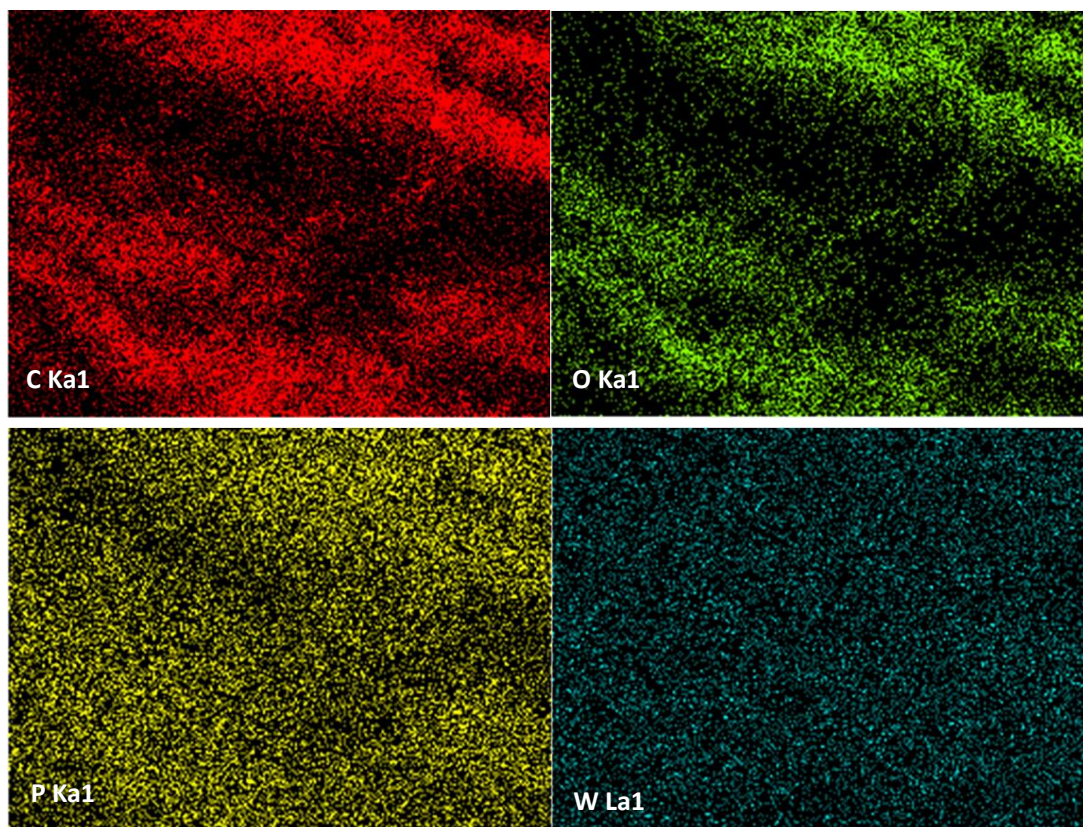

**Fig. S1** EDS mapping of **P<sub>8</sub>W<sub>48</sub>/rGO** nanocomposite prepared by electrochemical reduction.

### **SI-1: X-ray photoelectron spectroscopy (XPS) analysis**

Fig. S2a and Fig. S2b show the C 1s XPS spectra of **GO** and **P<sub>8</sub>W<sub>48</sub>/rGO**. It can be clearly seen that the content of C–O group (integration of C–OH and C–O–C) decreases from initial 48.9% of **GO** to 29.5% (shown in Table S1) of **P<sub>8</sub>W<sub>48</sub>/rGO**, indicating that the electrochemical reduction can effectively decrease the amount of oxygen containing groups on **GO**. Meanwhile, the content of graphite-like C (integration of C–C and C=C) group increased from initial 42% to 63.3%, indicating that significant  $sp^3/sp^2$ -hybridized carbon structures were restored. The W (4f) and P (2p) XPS spectras of **P<sub>8</sub>W<sub>48</sub>/rGO** were also shown in Fig. S2. The W 4f<sub>7/2</sub> and W 4f<sub>5/2</sub> doublets with binding energies of 35.48 and 37.62 eV (Fig. S2c) respectively for **P<sub>8</sub>W<sub>48</sub>/rGO** indicate that tungsten is in its full oxidation form ( $W^{VI}$ ) in **P<sub>8</sub>W<sub>48</sub>**, which is in line with that of precursor **P<sub>8</sub>W<sub>48</sub>** (Fig. S2e). It should be noted that there are broad peaks at the binding energy higher than 40 eV for both **P<sub>8</sub>W<sub>48</sub>** and **P<sub>8</sub>W<sub>48</sub>/rGO**, which can be assigned to  $W^{VI}$  loss features. The presence of phosphorus with strong signal was also detected in the **P<sub>8</sub>W<sub>48</sub>/rGO** composite as shown in Fig. S2d, even though it has low content in **P<sub>8</sub>W<sub>48</sub>** (the P 2p of **P<sub>8</sub>W<sub>48</sub>** was also shown in Fig. S2f), which indicates the intensive adsorption of **P<sub>8</sub>W<sub>48</sub>** on **rGO**. However, it is worth noting that the  $W^{VI}$

4f peaks of the  $\text{P}_8\text{W}_{48}/\text{rGO}$  nanocomposite shift to lower binding energies compared with those of  $\text{P}_8\text{W}_{48}$  (Table S2), which suggests the electron transfer from  $\text{P}_8\text{W}_{48}$  to rGO decreasing the electronegativity of the adjacent terminal oxygen atoms of  $\text{P}_8\text{W}_{48}$ .<sup>1</sup> On the other hand, the atomic ratios of P/W for both  $\text{P}_8\text{W}_{48}$  and  $\text{P}_8\text{W}_{48}/\text{rGO}$  are almost the same, which suggest the intact  $\text{P}_8\text{W}_{48}$  is still there in the  $\text{P}_8\text{W}_{48}/\text{rGO}$  nanocomposite. However, it is well known that XPS is not appropriate for quantitative determination of atomic percentage.

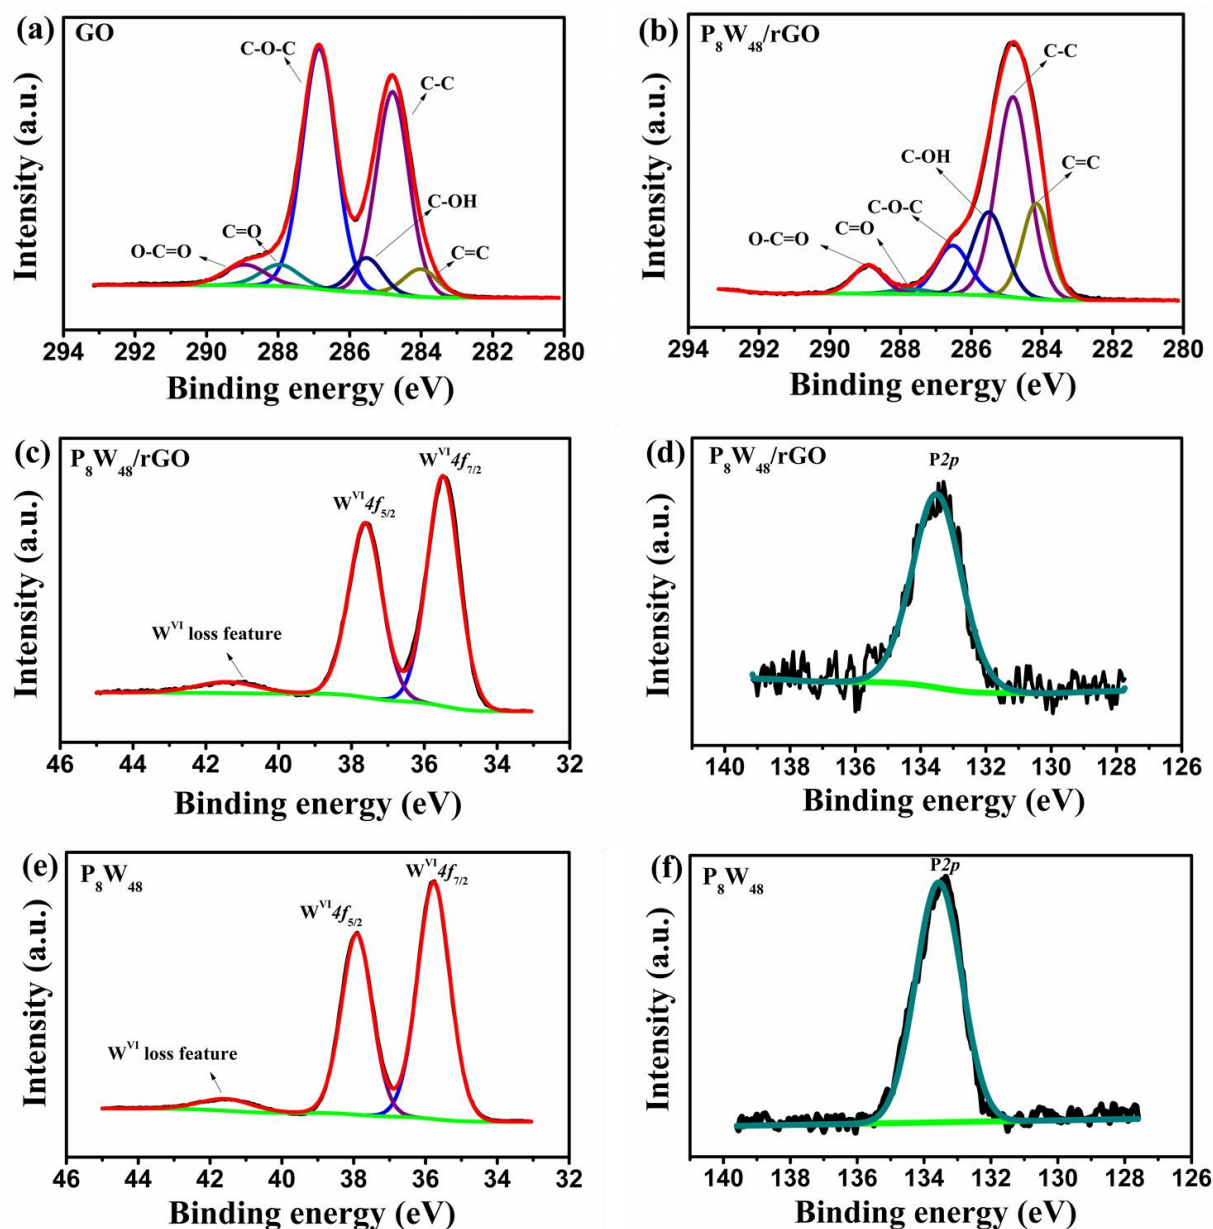

**Fig. S2** (a) C 1s XPS spectrum of GO. (b) C 1s, (c) W<sup>VI</sup> 4f and (d) P 2p XPS spectra of the as-prepared  $\text{P}_8\text{W}_{48}/\text{rGO}$  nanocomposite. (e) W<sup>VI</sup> 4f and (f) P 2p XPS spectra of  $\text{P}_8\text{W}_{48}$ .

**Table S1** Fitting of the C 1s peak binding energy (eV) (relative atomic percentage %)

| Samples                                   | graphite-like C |               | C-O           |               | C=O          | O-C=O        |
|-------------------------------------------|-----------------|---------------|---------------|---------------|--------------|--------------|
|                                           | C-C             | C=C           | C-OH          | C-O-C         |              |              |
| <b>GO</b>                                 | 284.8 [36.8%]   | 284.0 [5.2%]  | 285.5 [5.6%]  | 286.9 [43.3%] | 288.0 [4.3%] | 288.9 [4.8%] |
| <b>P<sub>8</sub>W<sub>48</sub>/rGO</b>    | 284.8 [45.2%]   | 284.2 [18.1%] | 285.5 [18.6%] | 286.5 [10.9%] | 287.8 [1.4%] | 288.9 [5.8%] |
| <b>P<sub>8</sub>W<sub>48</sub>/rGO-25</b> | 284.8 [40.8%]   | 284.0 [1.6%]  | 285.7 [11.4%] | 286.9 [35.9%] | 287.9 [6.5%] | 289.0 [3.8%] |
| <b>P<sub>8</sub>W<sub>48</sub>/rGO-50</b> | 284.8 [41.7%]   | 284.2 [5.0%]  | 285.8 [16.3%] | 287.0 [27.1%] | 287.7 [5.4%] | 288.9 [4.5%] |

**Table S2** The binding energies (BE) of P 2p and W 4f and the atomic ratio of P/W for **P<sub>8</sub>W<sub>48</sub>**, **P<sub>8</sub>W<sub>48</sub>/rGO**, **P<sub>8</sub>W<sub>48</sub>/rGO-25** and **P<sub>8</sub>W<sub>48</sub>/rGO-50** respectively

| Samples                                   | BE (P 2p) | BE (W 4f <sub>7/2</sub> ) | BE (W 4f <sub>5/2</sub> ) | P/W (At. %/ At. %) |
|-------------------------------------------|-----------|---------------------------|---------------------------|--------------------|
| <b>P<sub>8</sub>W<sub>48</sub></b>        | 133.54    | 35.77                     | 37.91                     | 0.229              |
| <b>P<sub>8</sub>W<sub>48</sub>/rGO</b>    | 133.50    | 35.48                     | 37.62                     | 0.227              |
| <b>P<sub>8</sub>W<sub>48</sub>/rGO-25</b> | 133.42    | 35.58                     | 37.72                     | 0.311              |
| <b>P<sub>8</sub>W<sub>48</sub>/rGO-50</b> | 133.51    | 35.70                     | 37.80                     | 0.315              |

## SI-2: Raman spectroscopy analysis

Raman spectroscopy can provide additional information for probing defects and structural properties of carbon materials. As shown in Fig. S3, two fundamental vibrations which are attributed to the D (~1350 cm<sup>-1</sup>) and G (~1595 cm<sup>-1</sup>) bands, respectively, are observed for both **GO** and **P<sub>8</sub>W<sub>48</sub>/rGO**. The D band is a breathing mode or k-point photons of A<sub>1g</sub> symmetry originating from the disorder-induced mode associated with structural defects and imperfections and the G band corresponds to the first-order scattering of the E<sub>2g</sub> mode from the sp<sup>2</sup> carbon domains.<sup>2,3</sup> The intensity ratio of D and G bands,  $I_D/I_G$ , can be used for the determination of disorder degree and average size of the sp<sup>2</sup> domains. It can be observed that the  $I_D/I_G$  intensity ratio of **P<sub>8</sub>W<sub>48</sub>/rGO** (1.30) is higher than that of **GO** (0.92), indicating a decrease in the average size of the sp<sup>2</sup> domains upon reduction of exfoliated **GO**, and it can be explained if new graphitic domains were created that are smaller in size than those present in **GO** before reduction, but more abundant in number.<sup>4</sup>



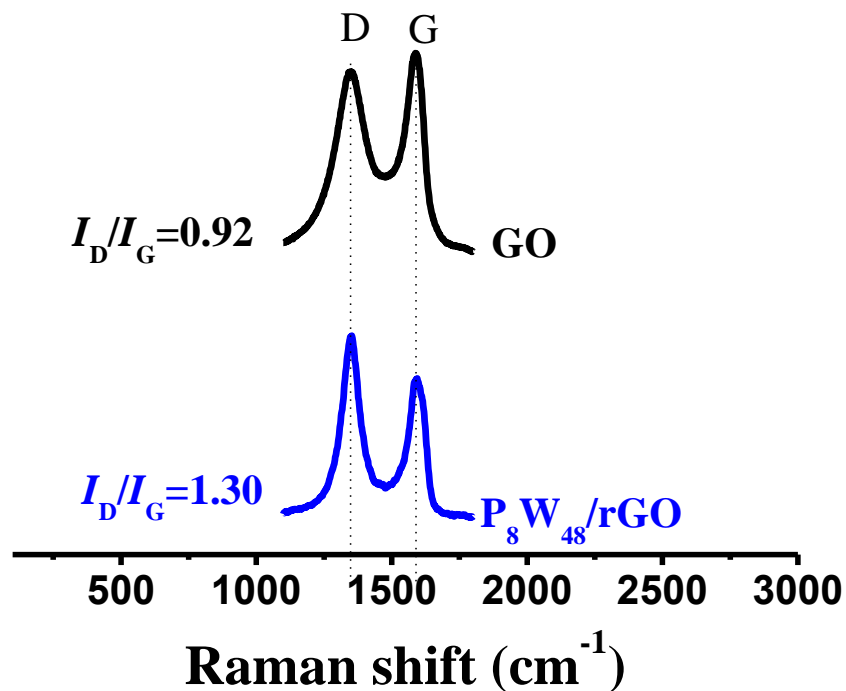

**Fig. S3** Raman spectra of **GO** and **P<sub>8</sub>W<sub>48</sub>/rGO** nanocomposite.

### SI-3: Fourier transform infrared spectroscopy (FT-IR) analysis

FT-IR spectra were recorded to further confirm the structural integrity of **P<sub>8</sub>W<sub>48</sub>** in the **P<sub>8</sub>W<sub>48</sub>/rGO** nanocomposite. Figure S4 shows the FT-IR spectra of **GO**, **rGO**, **P<sub>8</sub>W<sub>48</sub>** and **P<sub>8</sub>W<sub>48</sub>/rGO** nanocomposite. It can be clearly observed that the Hummer's **GO** has the characteristic signals of  $\text{-OH}$  group,  $\text{C=O}$  symmetry vibration peaks,  $\text{C=C}$   $\text{sp}^2$  species and  $\text{C-O}$  vibration peaks. When the **GO** reduction reaction occurred, no stretching vibration of carboxyl groups was observed in the spectra of both **rGO** and **P<sub>8</sub>W<sub>48</sub>/rGO**, confirming the efficient reduction of **GO** to **rGO**.<sup>[6,10b]</sup> It should be noted that the  $\text{C-O}$  vibration peaks and hydroxyl groups are still remained in the **rGO**, which facilitates its interaction with **P<sub>8</sub>W<sub>48</sub>**; the  $\text{C-O}$  vibration peaks in the spectra of **rGO** are merged with the POM bands (vibration bands of  $\nu_{\text{as}} \text{P-O}$ ) in that of **P<sub>8</sub>W<sub>48</sub>/rGO**. On the other hand, the POM bands for the free **P<sub>8</sub>W<sub>48</sub>** are at  $1140 \text{ cm}^{-1}$  and  $1084 \text{ cm}^{-1}$  ( $\nu_{\text{as}} \text{P-O}$ ),<sup>[1]</sup>  $1015 \text{ cm}^{-1}$  ( $\nu_{\text{as}} \text{W=O}_t$ ),  $924 \text{ cm}^{-1}$  ( $\nu_{\text{as}} \text{W-O}_b\text{-W}$ ), and  $807 \text{ cm}^{-1}$  ( $\nu_{\text{as}} \text{W-O}_c\text{-W}$ ). Whereas for the **P<sub>8</sub>W<sub>48</sub>/rGO** nanocomposite, all corresponding bands are shifted by several wavenumbers and identified at  $1140 \text{ cm}^{-1}$  and  $1100 \text{ cm}^{-1}$  for  $\nu_{\text{as}} \text{P-O}$ ,  $1034 \text{ cm}^{-1}$  for  $\nu_{\text{as}} \text{W=O}_t$ ,  $904 \text{ cm}^{-1}$  for  $\nu_{\text{as}} \text{W-O}_b\text{-W}$ , and  $820 \text{ cm}^{-1}$  for  $\nu_{\text{as}} \text{W-O}_c\text{-W}$ , although some peaks are weak due to the low concentrations of **P<sub>8</sub>W<sub>48</sub>** on **rGO**. Altogether, these results suggest a strong interaction between the **rGO** sheets and the grafted, intact **P<sub>8</sub>W<sub>48</sub>** nanoclusters, which is in agreement with the XPS observations.

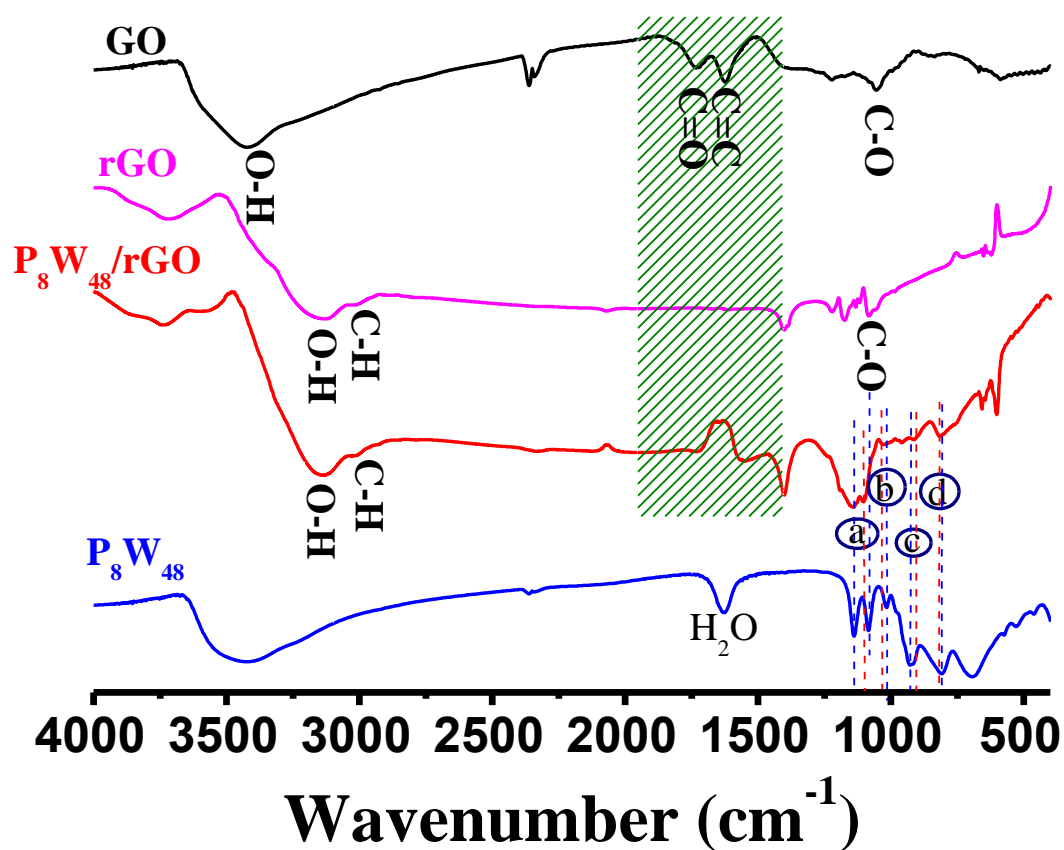

**Fig. S4** FT-IR spectra of GO, rGO,  $\text{P}_8\text{W}_{48}$  and  $\text{P}_8\text{W}_{48}/\text{rGO}$  nanocomposite. The shaded region from  $\sim 1400$  to  $1900 \text{ cm}^{-1}$  includes the signal of the C=C  $\text{sp}^2$  species and carboxylic groups. The peak observed at  $\sim 1600 \text{ cm}^{-1}$  in the spectra of  $\text{P}_8\text{W}_{48}$  is due to the hydration water molecules. Notes: *a*  $\nu_{\text{as}}$  P–O, *b*  $\nu_{\text{as}}$  W=O, *c*  $\nu_{\text{as}}$  W–O<sub>b</sub>–W, *d*  $\nu_{\text{as}}$  W–O<sub>c</sub>–W.

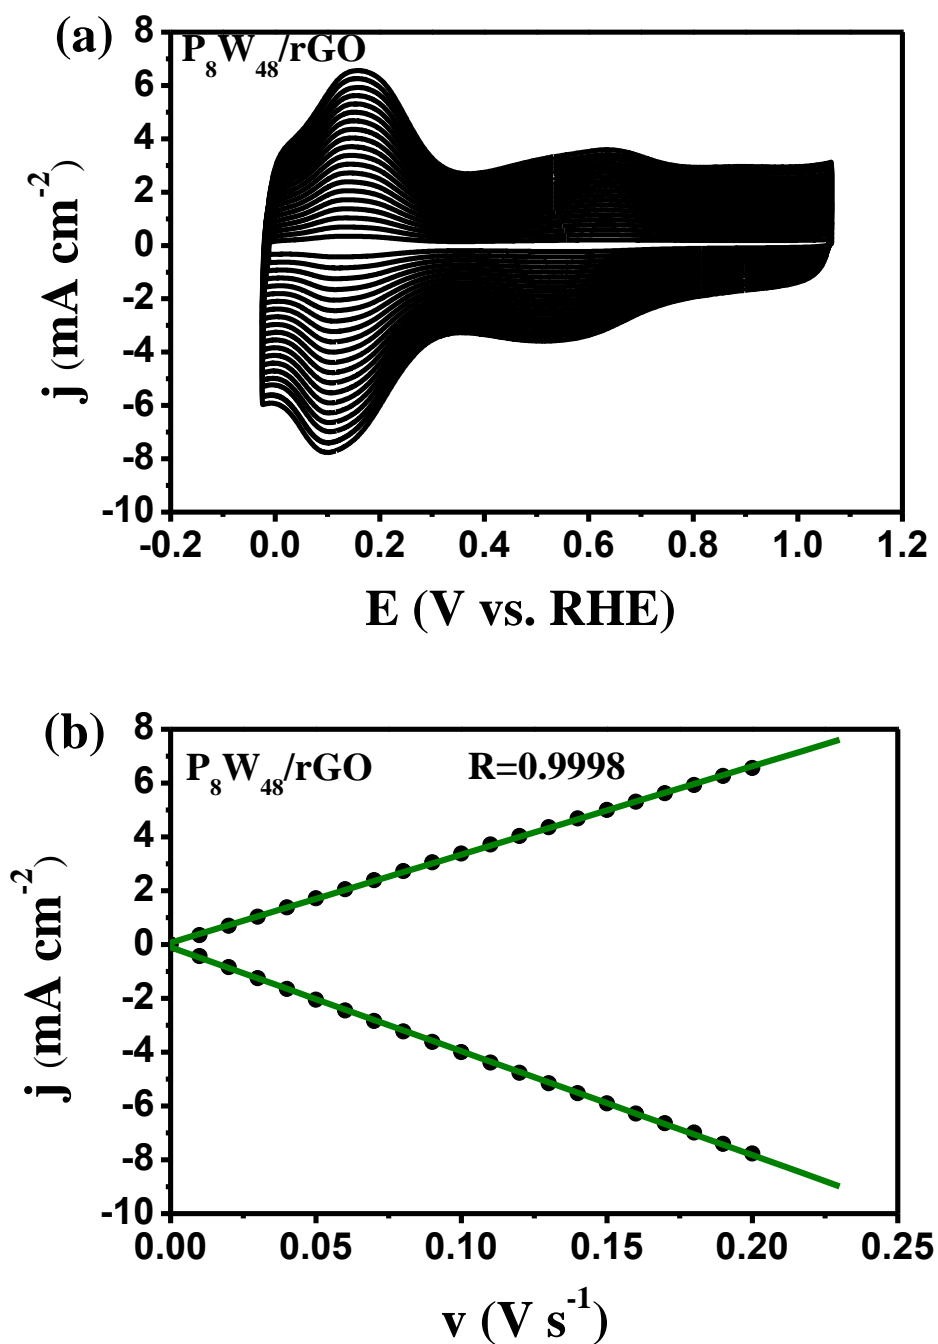

**Fig. S5** (a) Cyclic voltammograms and peak current intensity variations for  $P_8W_{48}/rGO$  in a 0.5 M  $H_2SO_4$  (pH 0.3) medium in the potential domain from 1.065 V to  $\sim (-0.025)$  V vs. RHE. The cyclic voltammograms are shown as a function of scan rate (from inner to outer curve: 10, 20, 30, 40, 50, 60, 70, 80, 90, 100, 110, 120, 130, 140, 150, 160, 170, 180, 190 and 200  $mV\ s^{-1}$ , respectively). (b) Dependence of cathodic and anodic peak currents of the first W wave as a function of the scan rate.



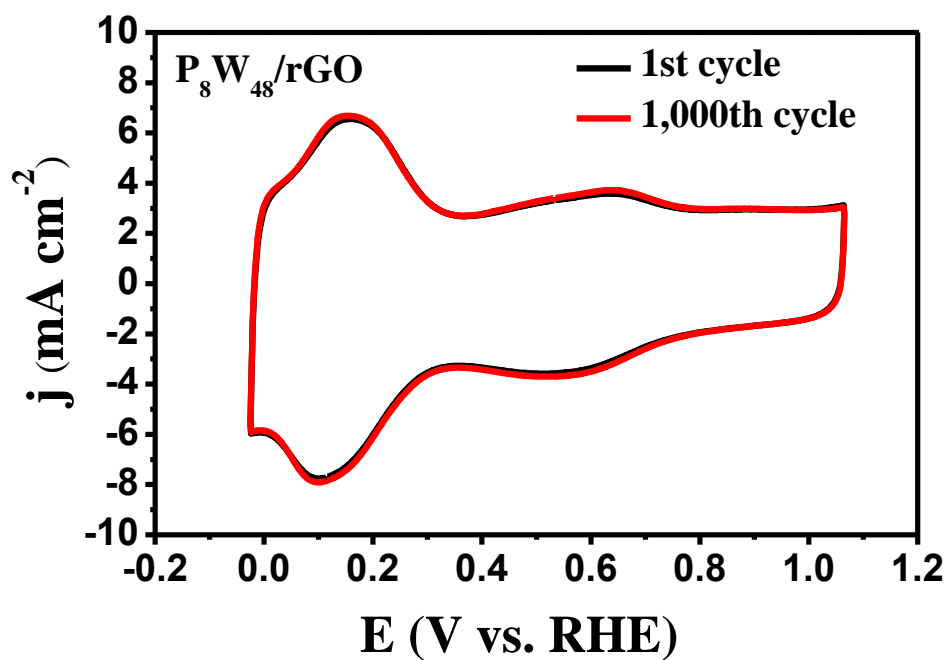

**Fig. S6** Comparison of the cyclic voltammograms recorded with  $P_8W_{48}/rGO$  before and after 1,000 cycles in a 0.5 M  $H_2SO_4$  (pH=0.3) medium. The scan rate was  $200 \text{ mV s}^{-1}$ .

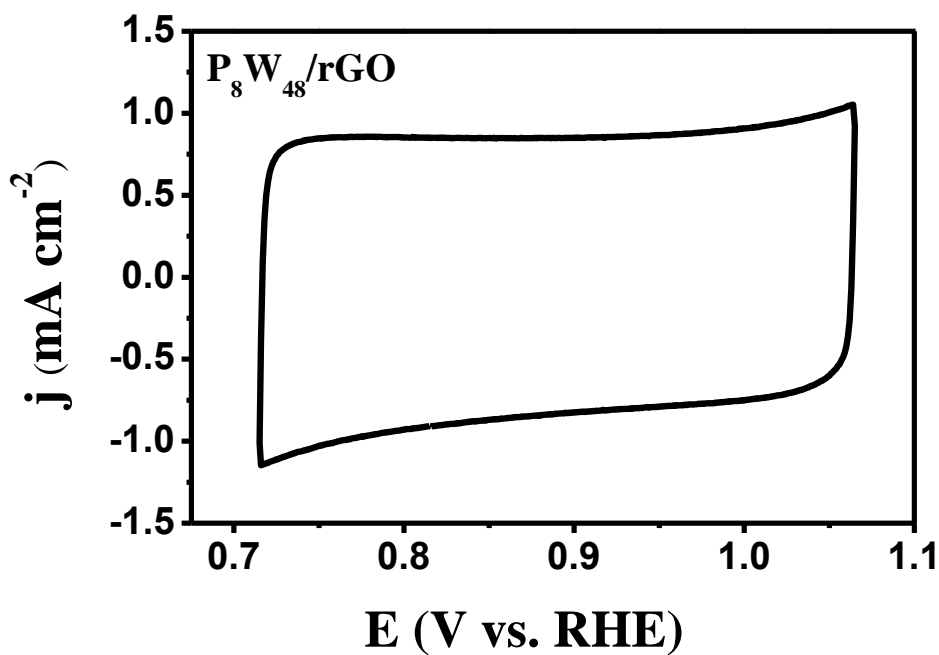

**Fig. S7** Cyclic voltammogram recorded with  $P_8W_{48}/rGO$  in a 0.5 M  $H_2SO_4$  (pH=0.3) medium in the potential domain from 1.065 V to 0.715 V vs. RHE. The scan rate was  $100 \text{ mV s}^{-1}$ .

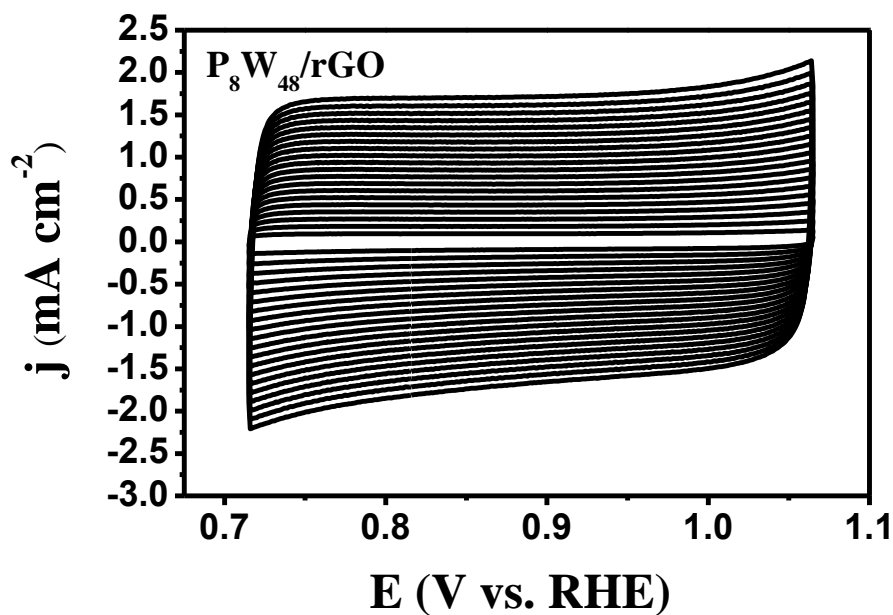

**Fig. S8** Cyclic voltammograms and current intensity variations for  $P_8W_{48}/rGO$  in a 0.5 M  $H_2SO_4$  (pH 0.3) medium in the potential domain from 1.065 V to 0.715 V vs. RHE. The cyclic voltammograms are shown as a function of scan rate (from inner to outer curve: 10, 20, 30, 40, 50, 60, 70, 80, 90, 100, 110, 120, 130, 140, 150, 160, 170, 180, 190 and 200  $mV\ s^{-1}$ , respectively).

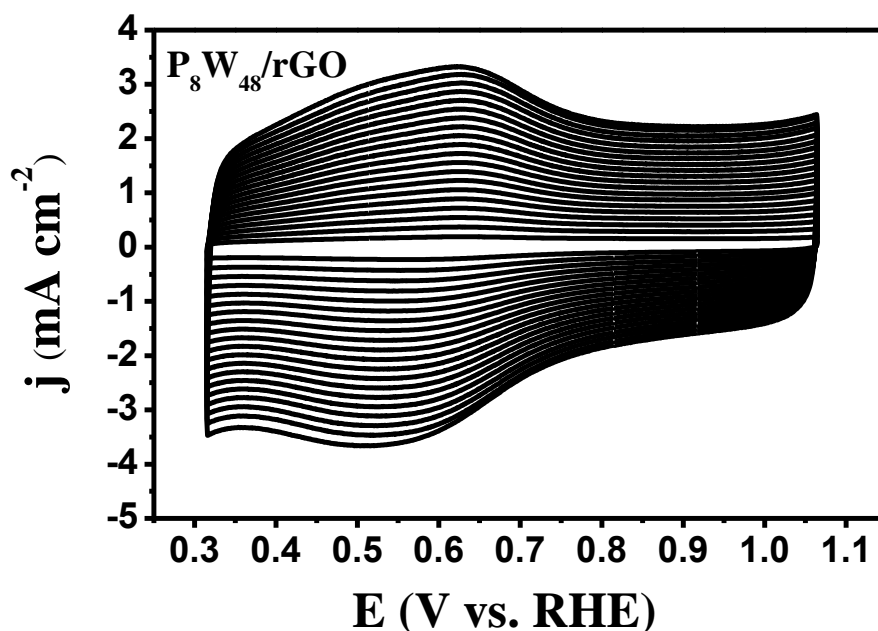

**Fig. S9** Cyclic voltammograms and peak current intensity variations for  $P_8W_{48}/rGO$  in a 0.5 M  $H_2SO_4$  (pH 0.3) medium in the potential domain from 1.065 V to ~0.315 V vs. RHE. The cyclic voltammograms are shown as a function of scan rate (from inner to outer curve: 10, 20, 30, 40, 50, 60, 70, 80, 90, 100, 110, 120, 130, 140, 150, 160, 170, 180, 190 and 200  $mV\ s^{-1}$ , respectively).

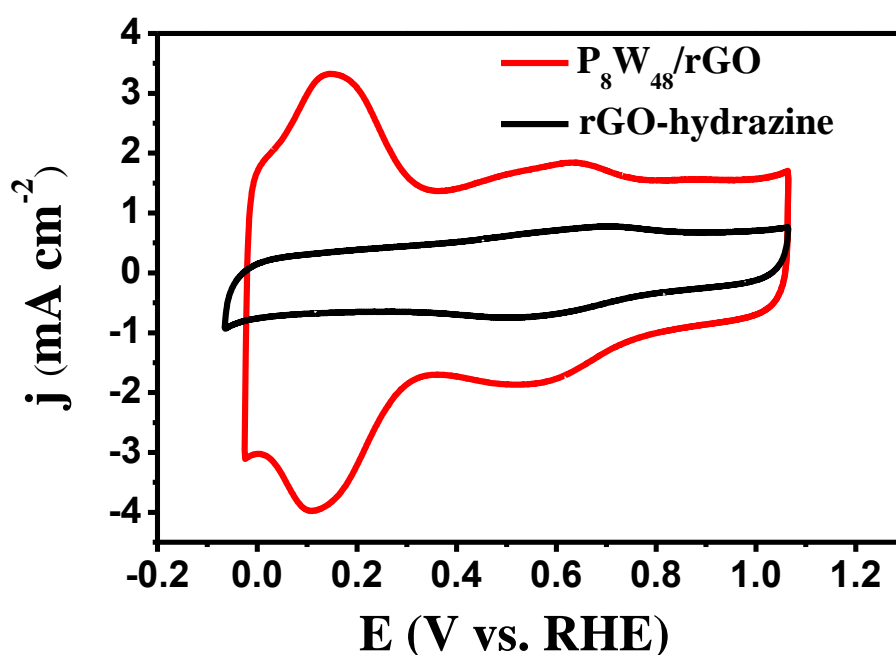

**Fig. S10** Superimposed representative cyclic voltammograms of **P<sub>8</sub>W<sub>48</sub>/rGO** and **rGO-hydrazine** recorded in a 0.5 M H<sub>2</sub>SO<sub>4</sub> (pH 0.3) medium at a scan rate of 100 mV s<sup>-1</sup>.

#### SI-4: Pt deposition

When Pt is used as the counter electrode, and there are chlorides impurities in the electrolyte, Pt counter electrode dissolution will happen and thus the Pt deposition on the working electrode, which will increase the HER current and will make wrong estimation of the real catalytic activities of the catalysts. In order to ascertain this, protocols are as follows. A standard three-electrode cell was used and was controlled at 25 °C using a water bath during the experiment. The prepared P<sub>8</sub>W<sub>48</sub>/rGO modified GC RDE (4 mm in diameter) was used as the working electrode. A Pt gauze and a SCE were used as counter and reference electrodes, respectively. The electrolyte, 0.5 M H<sub>2</sub>SO<sub>4</sub> (pH=0.3), was saturated with ultrahigh-purity Ar for at least 30 min and kept under a positive pressure of this gas during the experiments. To speed up the anodic dissolution of Pt in acidic media, the Pt counter electrode and the working electrode were placed in the same compartment, and the reference electrode was separated by a glass frit. For Pt deposition, 5 mM HCl was added to the electrolyte, and then continuous potential cycling (1758 cycles) was performed in the potential domain from +1.065 to -0.05 V vs. RHE at a scan rate of 50 mV s<sup>-1</sup>. As the cycling goes, the characteristics of the HER wave is evolved and improved gradually. Fig. S11a shows that the CV of the resulting tricomponent **Pt-P<sub>8</sub>W<sub>48</sub>/rGO** exhibits an additional oxidation wave at + 0.02 V compared to

that of  $\text{P}_8\text{W}_{48}/\text{rGO}$ , along with the apparent HER wave. This oxidation wave is attributed to hydrogen oxidation as featured at the same location on the  $\text{Pt}/\text{C}$  CV (Fig. S11b).

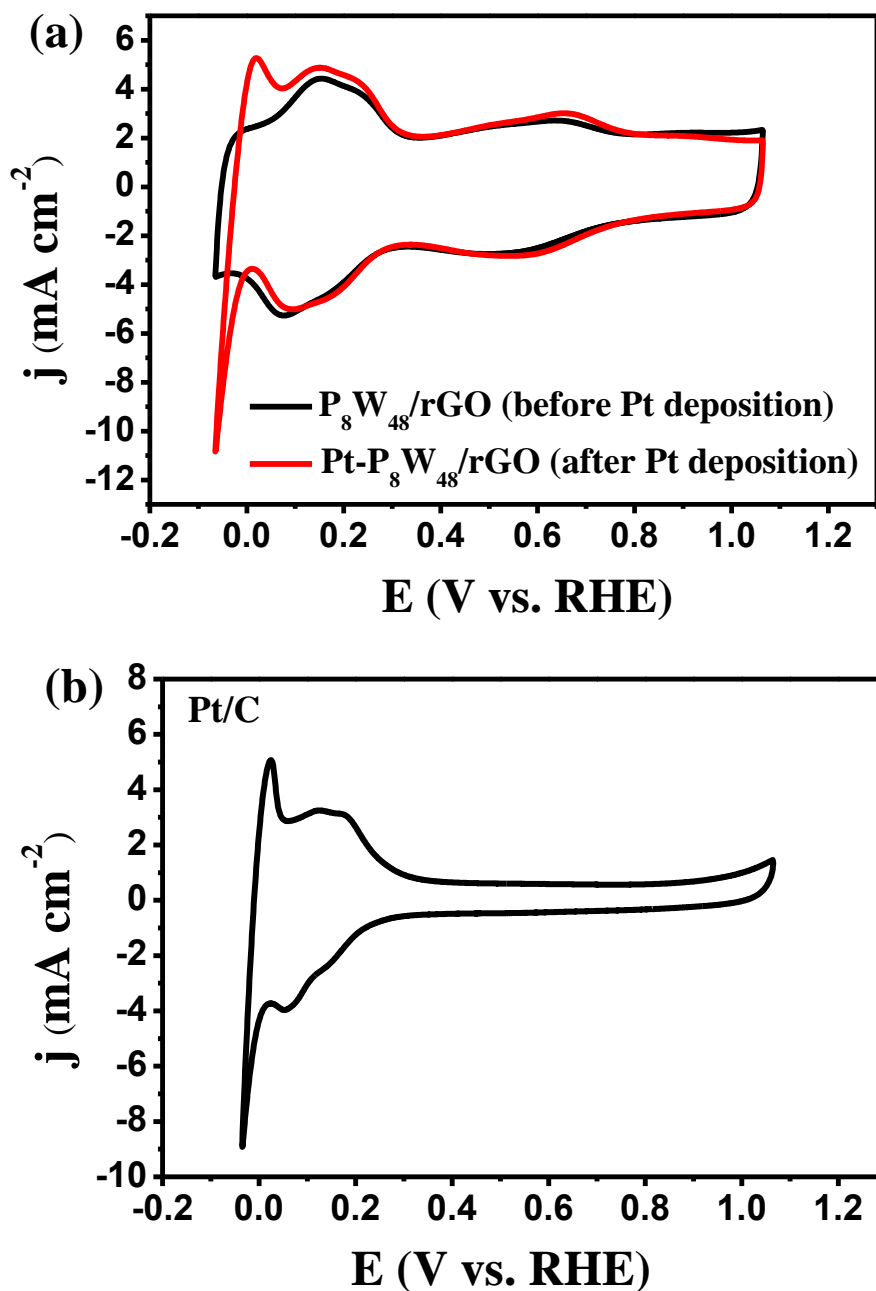

**Fig. S11** (a) Comparison of representative cyclic voltammograms of  $\text{P}_8\text{W}_{48}/\text{rGO}$  and  $\text{Pt-P}_8\text{W}_{48}/\text{rGO}$  after Pt deposition. (b) Cyclic voltammograms of  $\text{Pt}/\text{C}$ . The catalyst loading was  $0.3 \text{ mg cm}^{-2}$ . The scan rate was  $100 \text{ mV s}^{-1}$ .

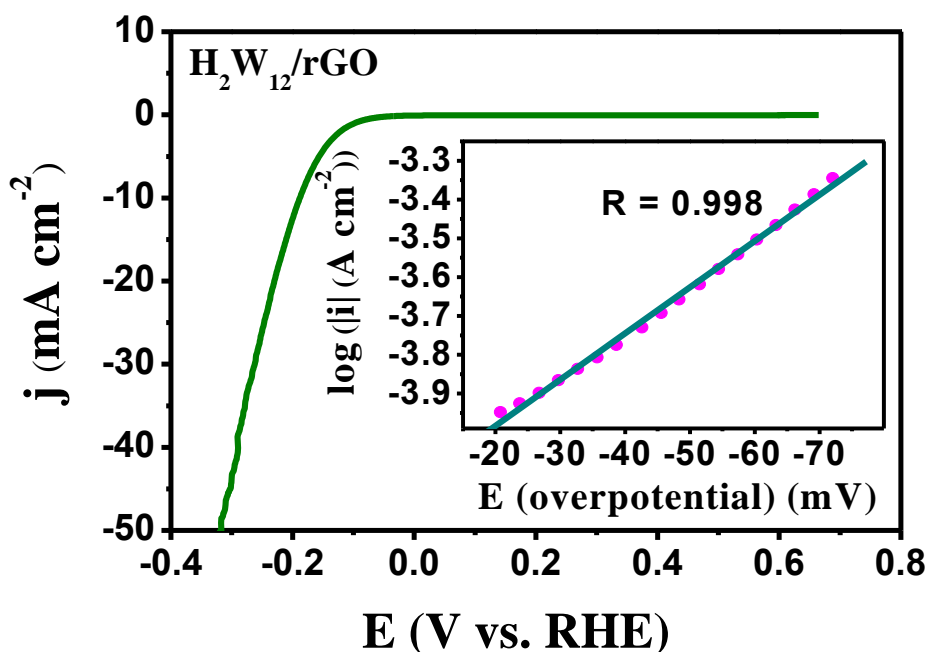

**Fig. S12** Polarization curve obtained with  $\text{H}_2\text{W}_{12}/\text{rGO}$  recorded on glassy carbon electrode, the inset is the corresponding Tafel plot obtained from the LSV curve.

**Table S3** Comparison of HER activity measured for  $\text{P}_8\text{W}_{48}/\text{rGO}$  with that reported for other systems with known HER activity under acidic conditions.

| catalyst                                   | Loading<br>( $\text{mg cm}^{-2}$ ) | Electrode     | Electrolyte                  | $J^a$ ( $\text{mA cm}^{-2}$ ) | $\eta^b$ (mV vs. RHE) | $J_0^c$ ( $\text{A cm}^{-2}$ ) | Tafel slope<br>( $\text{mV dec}^{-1}$ ) | TOF ( $\text{s}^{-1}$ )  | Ref.      |
|--------------------------------------------|------------------------------------|---------------|------------------------------|-------------------------------|-----------------------|--------------------------------|-----------------------------------------|--------------------------|-----------|
| $\text{P}_8\text{W}_{48}/\text{rGO}$       | 0.3                                | Glassy carbon | 0.5M $\text{H}_2\text{SO}_4$ | 10                            | 28                    | $2 \times 10^{-3}$             | 38                                      | 1.4 (195) <sup>d</sup>   | This work |
|                                            |                                    |               |                              | 20                            | 39                    |                                |                                         | 4.5 (245) <sup>d</sup>   |           |
|                                            |                                    |               |                              | 50                            | 70                    |                                |                                         | 11.3 (295) <sup>d</sup>  |           |
| rGO-hydrazine                              | 0.3                                | Glassy carbon | 0.5M $\text{H}_2\text{SO}_4$ | 1                             | ~180                  | $1.14 \times 10^{-5}$          | 84                                      | N/A                      | This work |
| $\text{H}_2\text{W}_{12}/\text{rGO}$       | 0.3                                | Glassy carbon | 0.5M $\text{H}_2\text{SO}_4$ | 10                            | ~188                  | $6 \times 10^{-5}$             | 84                                      | N/A                      | This work |
| $\text{Co}_{0.6}\text{Mo}_{1.4}\text{N}_2$ | 0.243                              | Glassy carbon | 0.1M $\text{HClO}_4$         | 10                            | ~190                  | $2.3 \times 10^{-4}$           | N/A                                     | N/A                      | 5         |
| $\text{Ni}_2\text{P}$                      | 1                                  | Ti foil       | 0.5M $\text{H}_2\text{SO}_4$ | 20                            | 130                   | $4.91 \times 10^{-4}$          | 46                                      | 0.015 (100) <sup>d</sup> | 6         |
|                                            |                                    |               |                              |                               |                       |                                |                                         | 0.5 (200) <sup>d</sup>   |           |
| 2H-MoS <sub>2</sub> film                   | N/A                                | Glassy carbon | 0.5M $\text{H}_2\text{SO}_4$ | 1                             | 300                   | $2.4 \times 10^{-6}$           | 86                                      | 0.013 (0) <sup>d</sup>   | 7         |
| MoS <sub>2</sub> / MoO <sub>3</sub>        | N/A                                | FTO           | 0.5M $\text{H}_2\text{SO}_4$ | 2                             | 200                   | N/A                            | 50-60                                   | 4 (272) <sup>d</sup>     | 8         |

|                                                        |                              |                             |                                      |       |      |                       |      |                            |    |
|--------------------------------------------------------|------------------------------|-----------------------------|--------------------------------------|-------|------|-----------------------|------|----------------------------|----|
| 1T-Li <sub>6</sub> MoS <sub>2</sub>                    | N/A                          | Graphitic rod               | 0.5M H <sub>2</sub> SO <sub>4</sub>  | 10    | 185  | N/A                   | 43   | N/A                        | 9  |
| Bulk Mo <sub>2</sub> C                                 | 3.3                          | Carbon paste                | 0.5M H <sub>2</sub> SO <sub>4</sub>  | 20    | ~225 | 1.3×10 <sup>-6</sup>  | 56   | N/A                        | 10 |
| Bulk MoB                                               | 2                            | electrode                   | 0.5M H <sub>2</sub> SO <sub>4</sub>  | 20    | ~225 | 1.4×10 <sup>-6</sup>  | 55   | N/A                        |    |
| Mo <sub>2</sub> C/CNT                                  | 2                            | Carbon paper                | 0.1M HClO <sub>4</sub>               | 10    | ~150 | 1.4×10 <sup>-5</sup>  | 55.2 | N/A                        | 11 |
| NiMoNx/C                                               | 0.25                         | Glassy carbon               | 0.1M HClO <sub>4</sub>               | 3.5   | ~200 | 2.4×10 <sup>-4</sup>  | 35.9 | N/A                        | 12 |
| Ni-Mo                                                  | 3                            | Ti foil                     | 0.5M H <sub>2</sub> SO <sub>4</sub>  | 20    | 80   | N/A                   | N/A  | 0.05 (100) <sup>d</sup>    | 13 |
|                                                        |                              |                             |                                      |       |      |                       |      | 0.36 (200) <sup>d</sup>    |    |
| MoS <sub>2</sub> /rGO                                  | 0.28                         | Glassy carbon               | 0.5M H <sub>2</sub> SO <sub>4</sub>  | 10    | ~150 | N/A                   | 41   | N/A                        | 14 |
| POMOFs                                                 | 0.1                          | Carbon paste<br>electrode   | 1 M LiCl + HCl<br>(pH 1)             | NA    | NA   | N/A                   | N/A  | 6.7 (200) <sup>d</sup>     | 15 |
| (PEI/P <sub>5</sub> W <sub>30</sub> -rGO) <sub>n</sub> | N/A                          | Glassy carbon               | 0.05M H <sub>2</sub> SO <sub>4</sub> | 1.7   | 550  | N/A                   | N/A  | N/A                        | 16 |
| Hex-WO <sub>3</sub> by MH                              | N/A                          | Glassy carbon               | 1 M H <sub>2</sub> SO <sub>4</sub>   | 5.81  | 0    | 6.61×10 <sup>-3</sup> | 116  | N/A                        | 17 |
|                                                        |                              |                             |                                      | 33.67 | 100  |                       |      |                            |    |
|                                                        |                              |                             |                                      | 75.80 | 200  |                       |      |                            |    |
| WS <sub>2</sub> nanoflake                              | 0.35                         | Glassy carbon               | 0.5 M H <sub>2</sub> SO <sub>4</sub> | 10    | ~150 | N/A                   | 48   | N/A                        | 18 |
| 1T-WS <sub>2</sub> nanosheets                          | 1.0±0.2                      | graphite disk               | 0.5 M H <sub>2</sub> SO <sub>4</sub> | 10    | 142  | N/A                   | 70   | N/A                        | 19 |
| CoS <sub>2</sub> /rGO-CNT                              | 1.15 for<br>CoS <sub>2</sub> | 3D structure of<br>the film | 0.5 M H <sub>2</sub> SO <sub>4</sub> | 10    | 142  | 6.3×10 <sup>-5</sup>  | 51   | N/A                        | 20 |
|                                                        |                              |                             |                                      | 20    | 153  |                       |      |                            |    |
|                                                        |                              |                             |                                      | 100   | 178  |                       |      |                            |    |
| Ni <sub>12</sub> P <sub>5</sub>                        | 3                            | Ti foil                     | 0.5 M H <sub>2</sub> SO <sub>4</sub> | 10    | 107  | N/A                   | 63   | 0.019 (120) <sup>d</sup>   | 21 |
|                                                        |                              |                             |                                      | 20    | 141  |                       |      |                            |    |
|                                                        |                              |                             |                                      | 40    | 190  |                       |      |                            |    |
| CoP                                                    | 2                            | Ti foil                     | 0.5 M H <sub>2</sub> SO <sub>4</sub> | 20    | 85   | 1.4×10 <sup>-4</sup>  | 50   | 0.0047 (20) <sup>c</sup>   | 22 |
| CoP                                                    | 0.92                         | carbon<br>cloth             | 0.5 M H <sub>2</sub> SO <sub>4</sub> | 10    | 67   | 2.88×10 <sup>-4</sup> | 51   | 4 (240, pH=0) <sup>d</sup> | 23 |
|                                                        |                              |                             |                                      | 20    | 100  |                       |      |                            |    |
|                                                        |                              |                             |                                      | 100   | 204  |                       |      |                            |    |
| CoS <sub>2</sub> NW                                    | 1.7 ±0.3                     | graphite                    | 0.5 M H <sub>2</sub> SO <sub>4</sub> | 10    | 145  | 1.51×10 <sup>-5</sup> | 51.6 | N/A                        | 24 |
| W(S <sub>0.48</sub> Se <sub>0.52</sub> ) <sub>2</sub>  | 0.21                         | Carbon cloth                | 1 M H <sub>2</sub> SO <sub>4</sub>   | 100   | 360  | 2.9×10 <sup>-5</sup>  | 105  | N/A                        | 25 |
| MoS <sub>2</sub> /rGO                                  | 0.2                          | Glassy carbon               | 0.5 M H <sub>2</sub> SO <sub>4</sub> | 50    | 235  | N/A                   | 41   | N/A                        | 26 |

|                                                           |          |                       |                                      |     |         |                      |       |                         |    |
|-----------------------------------------------------------|----------|-----------------------|--------------------------------------|-----|---------|----------------------|-------|-------------------------|----|
| CoSe <sub>2</sub> NP                                      | 2.8      | Carbon fiber<br>paper | 0.5 M H <sub>2</sub> SO <sub>4</sub> | 10  | 139     | (4.9±1.4)            | 42.1  | N/A                     | 27 |
|                                                           |          |                       |                                      | 100 | 184     | ×10 <sup>-6</sup>    |       |                         |    |
| [Mo <sub>3</sub> S <sub>13</sub> ] <sup>2-</sup> clusters | 0.01-0.1 | Graphite paper        | 0.5 M H <sub>2</sub> SO <sub>4</sub> | 10  | 180-220 | N/A                  | 38-40 | 3 (200) <sup>d</sup>    | 28 |
| MoP   S                                                   | 3        | Ti foil               | 0.5 M H <sub>2</sub> SO <sub>4</sub> | 10  | 64      | 5.7×10 <sup>-4</sup> | 50    | 0.75 (150) <sup>d</sup> | 29 |
|                                                           |          |                       |                                      | 20  | 78      |                      |       |                         |    |
|                                                           |          |                       |                                      | 100 | 120     |                      |       |                         |    |
| double-gyroid<br>MoS <sub>2</sub>                         | 0.06     | FTO                   | 0.5 M H <sub>2</sub> SO <sub>4</sub> | 10  | ~ 230   | 6.9×10 <sup>-7</sup> | 50    | N/A                     | 30 |
| 1T WS <sub>2</sub>                                        | 0.0065   | Glassy carbon         | 0.5 M H <sub>2</sub> SO <sub>4</sub> | 10  | ~230    | 2×10 <sup>-5</sup>   | 60    | 175 (288) <sup>d</sup>  | 31 |
| cGO/MoS <sub>x</sub>                                      | N/A      | Carbon cloth          | 0.5 M H <sub>2</sub> SO <sub>4</sub> | 220 | 300     | N/A                  | 51.9  | N/A                     | 32 |
| NENU-500                                                  | ~0.38    | Glassy carbon         | 0.5 M H <sub>2</sub> SO <sub>4</sub> | 10  | 237     | 3.6×10 <sup>-5</sup> | 96    | N/A                     | 33 |

<sup>a</sup>Current density (mA cm<sup>-2</sup>)

<sup>b</sup>Overpotential (mV vs. RHE)

<sup>c</sup>Exchange current density (A cm<sup>-2</sup>)

<sup>d</sup>The TOF values were obtained at the specified overpotentials (mV vs. RHE)

<sup>e</sup>The TOF values were obtained at the specified current densities (mA cm<sup>-2</sup>)

<sup>N/A</sup>These values were unavailable



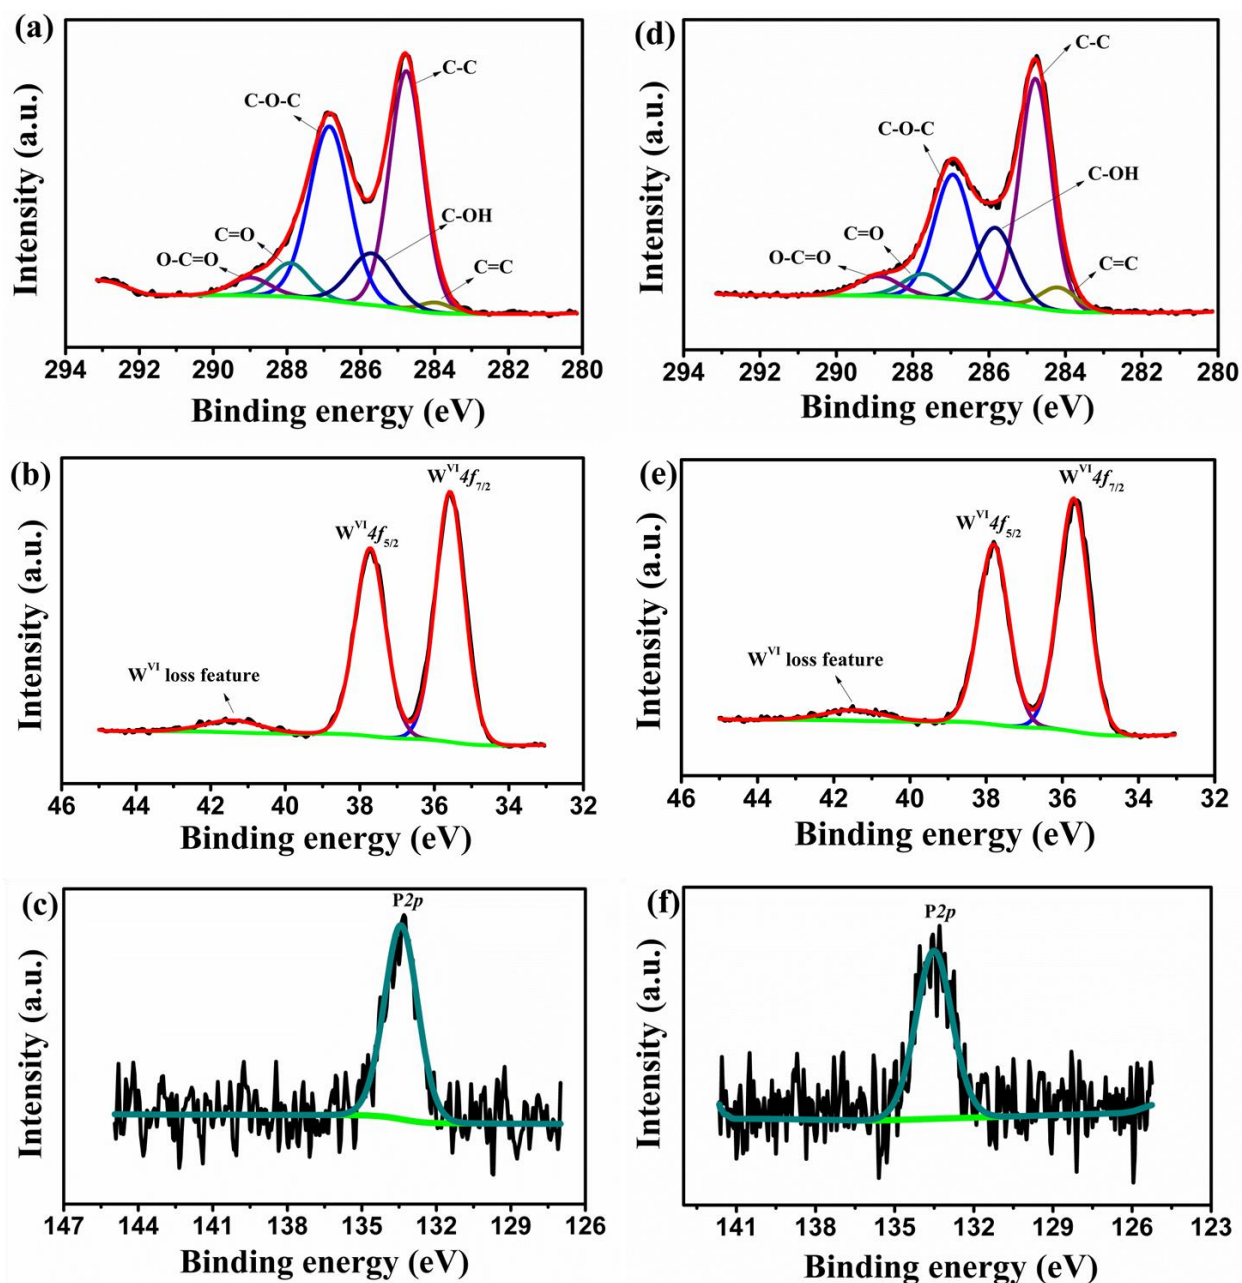

**Fig. S13** (a) C 1s, (b)  $W^{VI} 4f$  and (c) P 2p XPS spectra of the as-prepared  $P_8W_{48}/rGO-25$  nanocomposite.

(d) C 1s, (e)  $W^{VI} 4f$  and (f) P 2p XPS spectra of the as-prepared  $P_8W_{48}/rGO-50$  nanocomposite.

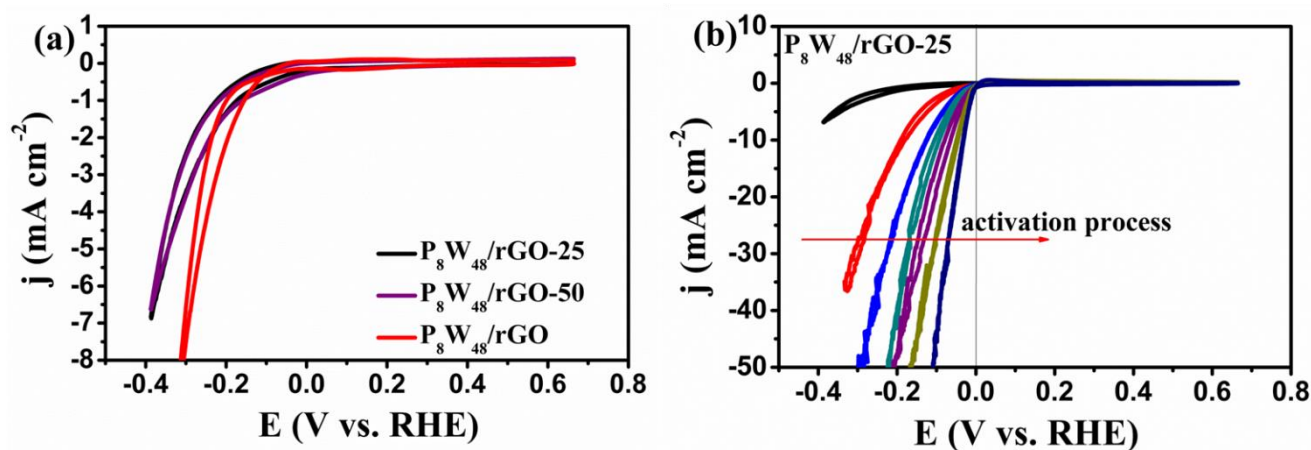

**Fig. S14** (a) Influences of reduction degree of GO on the performance of HER (the data was extracted from 10th cycle for each electrode). (b) The variation of the cyclic voltammogram characteristics of P<sub>8</sub>W<sub>48</sub>/rGO-25 during the potential cycling. The catalyst loading was 0.3 mg cm<sup>-2</sup>. The scan rate was 2 mV s<sup>-1</sup>.

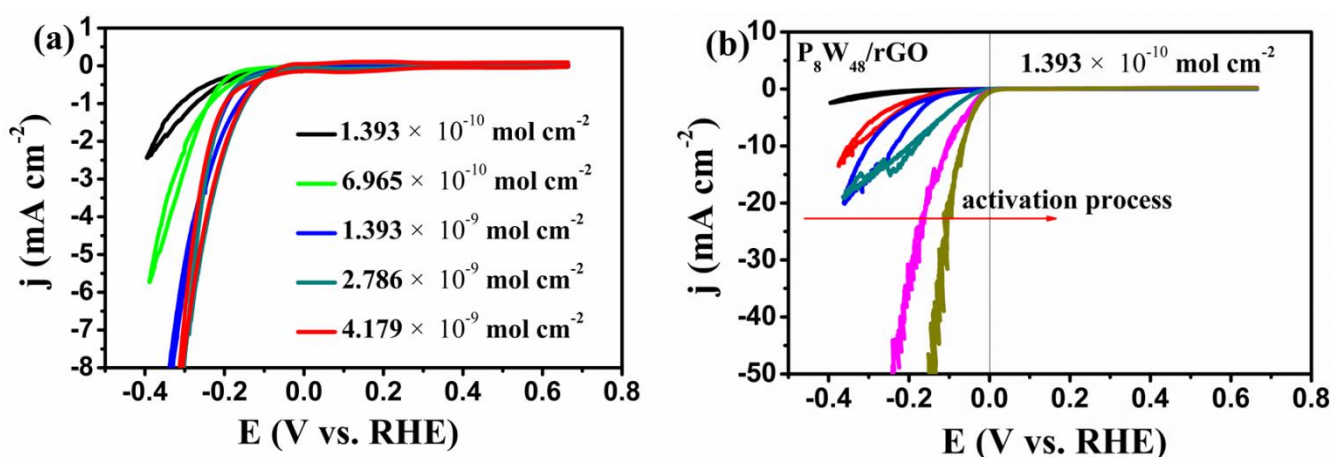

**Fig. S15** (a) Influences of the loading amount of P<sub>8</sub>W<sub>48</sub> on the performance of HER (the data was extracted from 10th cycle for each electrode). (b) The variation of the cyclic voltammogram characteristics of P<sub>8</sub>W<sub>48</sub>/rGO with P<sub>8</sub>W<sub>48</sub> loading of 1.393 × 10<sup>-10</sup> mol cm<sup>-2</sup> during the cycling. The scan rate was 2 mV s<sup>-1</sup>.

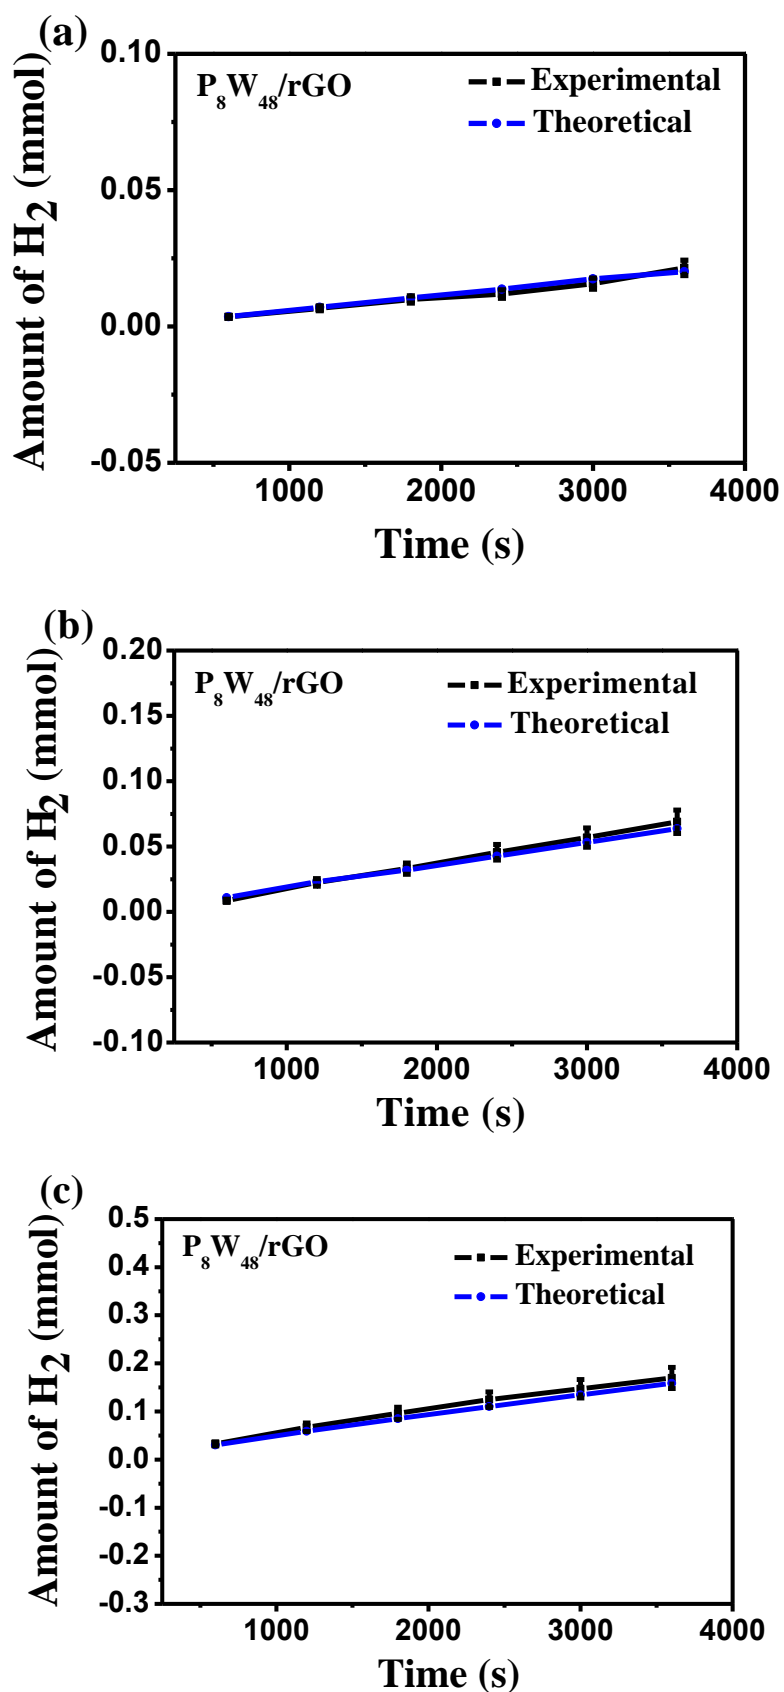

**Fig. S16** Faradaic yield (both experimentally measured and theoretically calculated) of  $H_2$  production versus time for  $P_8W_{48}/rGO$  at different overpotentials of (a)  $\eta = 195$  mV, (b)  $\eta = 245$  mV and (c)  $\eta = 295$  mV for 3600 s in 0.5 M  $H_2SO_4$ .

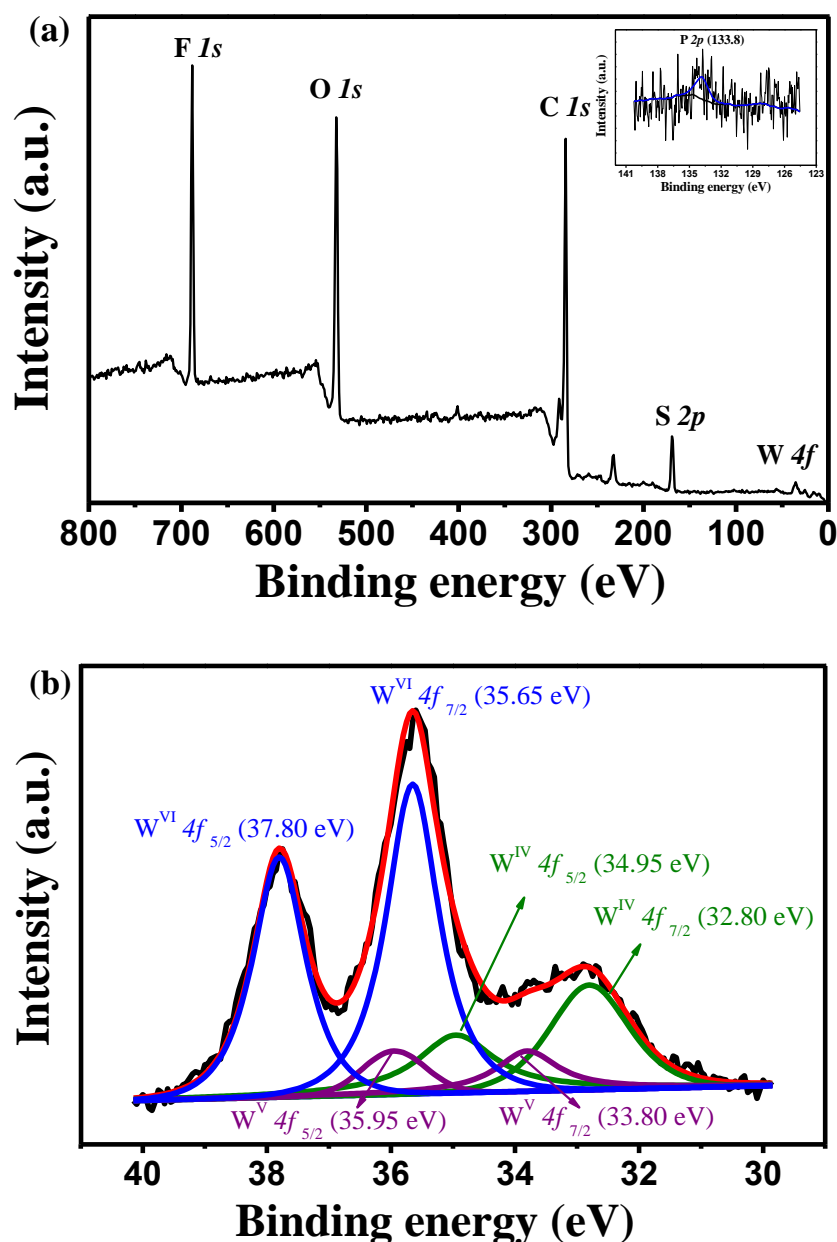

**Fig. S17** (a) XPS spectra (survey) and (b) W 4f XPS spectra recorded from the film (**P<sub>8</sub>W<sub>48</sub>/rGO/Nafion** modified electrode) after activation. Inset of (a) is the corresponding P 2p XPS spectra.

### SI-5: Description of Movie S1

Controlled potential coulometry measurement was performed for the quantitative detection of H<sub>2</sub> production at  $\eta=295$  mV. Hydrogen evolution occurred rapidly and at a high rate over the **P<sub>8</sub>W<sub>48</sub>/rGO** electrocatalytic film.

### References

1. Wang, S., Li, H., Li, S., Liu, F., Wu, D., Feng, X. & Wu, L. Electrochemical-reduction-assisted

- assembly of a polyoxometalate/graphene nanocomposite and its enhanced lithium-storage performance. *Chem. Eur. J.* **19**, 10895-10902 (2013).
- Ferrari, A. C., Meyer, J. C., Scardaci, V. C., Lazzeri, C. M., Mauri, F., Piscanec, S., Jiang, D., Novoselov, K. S., Roth, S. & Geim, A. K. Raman spectrum of graphene and graphene layers. *Phys. Rev. Lett.* **97**, 187401-187404 (2006).
  - Liu, R., Li, S., Zhang, G., Dolbecq, A., Mialane, P. & Keita, B. Polyoxometalate-mediated green synthesis of graphene and metal nanohybrids: high-performance electrocatalysts. *J. Clust. Sci.* **25**, 711–740 (2014).
  - Stankovich, S., Dikin, D. A., Piner, R. D., Kohlhaas, K. A., Kleinhammes, A., Jia, Y., Wu, Y., Nguyen, S. T. & Ruoff, R. S. Synthesis of graphene-based nanosheets via chemical reduction of exfoliated graphite oxide. *Carbon* **45**, 1558-1565 (2007).
  - Cao, B., Veith, G. M., Neufeind, J. C., Adzic, R. R. & Khalifah, P. G. Mixed close-packed cobalt molybdenum nitrides as non-noble metal electrocatalysts for the hydrogen evolution reaction. *J. Am. Chem. Soc.* **135**, 19186-19192 (2013).
  - Popczun, E. J., McKone, J. R., Read, C. G., Biacchi, A. J., Wiltrout, A. M., Lewis, N. S. & Schaak, R. E. Nanostructured nickel phosphide as an electrocatalyst for the hydrogen evolution reaction. *J. Am. Chem. Soc.* **135**, 9267-9270 (2013).
  - Kong, D., Wang, H., Cha, J. J., Pasta, M., Koski, K. J., Yao, J. & Cui, Y. Synthesis of MoS<sub>2</sub> and MoSe<sub>2</sub> films with vertically aligned layers. *Nano Lett.* **13**, 1341-1347 (2013).
  - Chen, Z., Cummins, D., Reinecke, B. N., Clark, E., Sunkara, M. K. & Jaramillo, T. F. Core-shell MoO<sub>3</sub>-MoS<sub>2</sub> nanowires for hydrogen evolution: A functional design for electrocatalytic materials. *Nano Lett.* **11**, 4168-4175 (2011).
  - Lukowski, M. A., Daniel, A. S., Meng, F., Forticaux, A., Li, L. & Jin, S. Enhanced hydrogen evolution catalysis from chemically exfoliated metallic MoS<sub>2</sub> nanosheets. *J. Am. Chem. Soc.* **135**, 10274-10277 (2013).
  - Vrubel, H. & Hu, X. Molybdenum boride and carbide catalyze hydrogen evolution in both acidic and basic solutions. *Angew. Chem.* **124**, 12875-12878 (2012).
  - Chen, W., Wang, C., Sasaki, K., Marinkovic, N., Xu, W., Muckerman, J. T., Zhu, Y. & Adzica, R. R. Highly active and durable nanostructured molybdenum carbide electrocatalysts for hydrogen production. *Energy Environ. Sci.* **6**, 943-951 (2013).

12. Chen, W., Sasaki, K., Ma, C., Frenkel, A. I., Marinkovic, N., Muckerman, J. T., Zhu, Y. & Adzic, R. R. Hydrogen-evolution catalysts based on non-noble metal nickel–molybdenum nitride nanosheets. *Angew. Chem. Int. Ed.* **51**, 6131-6135 (2012).
13. McKone, J. R., Sadtler, B. F., Werlang, C. A., Lewis, N. S. & Gray, H. B. Ni–Mo nanopowders for efficient electrochemical hydrogen evolution. *ACS Catal.* **3**, 166-169 (2013).
14. Li, Y., Wang, H., Xie, L., Liang, Y., Hong, G. & Dai, H. MoS<sub>2</sub> nanoparticles grown on graphene: An advanced catalyst for the hydrogen evolution reaction. *J. Am. Chem. Soc.* **133**, 7296-7299 (2011).
15. Nohra, B., El Moll, H., Rodriguez Albelo, L. M., Mialane, P., Marrot, J., Mellot-Draznieks, C., O’Keeffe, M., Ngo Biboum, R., Lemaire, J., Keita, B., Nadjio, L. & Dolbecq, A. Polyoxometalate-based metal organic frameworks (POMOFs): Structural trends, energetics, and high electrocatalytic efficiency for hydrogen evolution reaction. *J. Am. Chem. Soc.* **133**, 13363-13374 (2011).
16. Jiang, M., Zhu, D., Cai, J., Zhang, H. & Zhao, X. Electrocatalytic hydrogen evolution and oxygen reduction on polyoxotungstates/graphene nanocomposite multilayers. *J. Phys. Chem. C* **118**, 14371-14378 (2014).
17. Phuruangrat, A., Ham, D. J., Hong, S. J., Thongtema, S. & Lee, J. S. Synthesis of hexagonal WO<sub>3</sub> nanowires by microwave-assisted hydrothermal method and their electrocatalytic activities for hydrogen evolution reaction. *J. Mater. Chem.* **20**, 1683-1690 (2010).
18. Cheng, L., Huang, W., Gong, Q., Liu, C., Liu, Z., Li, Y. & Dai, H. Ultrathin WS<sub>2</sub> nanoflakes as a high-performance electrocatalyst for the hydrogen evolution reaction. *Angew. Chem. Int. Ed.* **53**, 7860-7863 (2014).
19. Lukowski, M. A., Daniel, A. S., English, C. R., Meng, F., Forticaux, A., Hamers, R. J. & Jin, S. Highly active hydrogen evolution catalysis from metallic WS<sub>2</sub> nanosheets. *Energy Environ. Sci.* **7**, 2608-2613 (2014).
20. Peng, S., Li, L., Han, X., Sun, W., Srinivasan, M., Mhaisalkar, S. G., Cheng, F., Yan, Q., Chen, J. & Ramakrishna, S. Cobalt sulfide nanosheet/graphene/carbon nanotube nanocomposites as flexible electrodes for hydrogen evolution. *Angew. Chem. Int. Ed.* **53**, 12594-12599 (2014).
21. Huang, Z., Chen, Z., Chen, Z., Lv, C., Meng, H. & Zhang, C. Ni<sub>12</sub>P<sub>5</sub> nanoparticles as an efficient catalyst for hydrogen generation via electrolysis and photoelectrolysis. *ACS Nano* **8**, 8121-8129 (2014).

22. Popczun, E. J., Read, C. G., Roske, C. W., Lewis, N. S. & Schaak, R. E. Highly active electrocatalysis of the hydrogen evolution reaction by cobalt phosphide nanoparticles. *Angew. Chem. Int. Ed.* **53**, 5427-5430 (2014).
23. Tian, J., Liu, Q., Asiri, A. M. & Sun, X. Self-supported nanoporous cobalt phosphide nanowire arrays: An efficient 3D hydrogen-evolving cathode over the wide range of pH 0–14. *J. Am. Chem. Soc.* **136**, 7587-7590 (2014).
24. Faber, M. S., Dziedzic, R., Lukowski, M. A., Kaiser, N. S., Ding, Q. & Jin, S. High-performance electrocatalysis using metallic cobalt pyrite (CoS<sub>2</sub>) micro- and nanostructures. *J. Am. Chem. Soc.* **136**, 10053-10061 (2014).
25. Xu, K., Wang, F., Wang, Z., Zhan, X., Wang, Q., Cheng, Z., Safdar, M. & He, J. Component-controllable WS<sub>2(1-x)</sub>Se<sub>2x</sub> nanotubes for efficient hydrogen evolution reaction. *ACS Nano* **8**, 8468-8476 (2014).
26. Zheng, X., Xu, J., Yan, K., Wang, H., Wang, Z. & Yang, S. Space-confined growth of MoS<sub>2</sub> nanosheets within graphite: The layered hybrid of MoS<sub>2</sub> and graphene as an active catalyst for hydrogen evolution reaction. *Chem. Mater.* **26**, 2344-2353 (2014).
27. Kong, D., Wang, H., Lu, Z. & Cui, Y. CoSe<sub>2</sub> nanoparticles grown on carbon fiber paper: an efficient and stable electrocatalyst for hydrogen evolution reaction. *J. Am. Chem. Soc.* **136**, 4897-4900 (2014).
28. Kibsgaard, J., Jaramillo, T. F. & Besenbacher, F. Building an appropriate active-site motif into a hydrogen-evolution catalyst with thiomolybdate [Mo<sub>3</sub>S<sub>13</sub>]<sup>2-</sup> clusters. *Nat. Chem.* **6**, 248-253 (2014).
29. Kibsgaard, J. & Jaramillo, T. F. Molybdenum phosphosulfide: an active, acid-stable, earth-abundant catalyst for the hydrogen evolution reaction. *Angew. Chem. Int. Ed.* **53**, 14433-14437 (2014).
30. Kibsgaard, J., Chen, Z., Reinecke, B. N. & Jaramillo, T. F. Engineering the surface structure of MoS<sub>2</sub> to preferentially expose active edge sites for electrocatalysis. *Nat. Mater.* **11**, 963-969 (2012).
31. Voiry, D., Yamaguchi, H., Li, J., Silva, R., Alves, D. C. B., Fujita, T., Chen, M., Asefa, T., Shenoy, V. B., Eda, G. & Chhowalla, M. Enhanced catalytic activity in strained chemically exfoliated WS<sub>2</sub> nanosheets for hydrogen evolution. *Nat. Mater.* **12**, 850-855 (2013).
32. Smith, A. J., Chang, Y., Raidongia, K., Chen, T., Li, L. & Huang, J. Molybdenum sulfide supported on crumpled graphene balls for electrocatalytic hydrogen production. *Adv. Energy Mater.* **4**, DOI: 10.1002/aenm.201400398 (2014).
33. Qin, J-S., Du, D-Y., Guan, W., Bo, X-J., Li, Y-F., Guo, L-P., Su, Z-M., Wang, Y-Y., Lan, Y. Q. & Zhou,



H-C. Ultrastable polymolybdate-based metal–organic frameworks as highly active electrocatalysts for hydrogen generation from water. *J. Am. Chem. Soc.* **137**, 7169-7177 (2015).
